# Supplementary material for: Synthesis of High-Density Indium Oxide Nanowires with Low Electrical Resistivity
Source: PubMed Central journal article supplement (PMC7690706; doi:10.3390/nano10112100), 2020-10-23
Supplement: nanomaterials-10-02100-s001.pdf [file nanomaterials-10-02100-s001.pdf]

# Supporting Information

## Synthesis of High-Density Indium Oxide Nanowires with Low Electrical Resistivity

Yu-Yang Chen <sup>1</sup>, Shu-Meng Yang <sup>1</sup> and Kuo-Chang Lu <sup>1,2,\*</sup>

<sup>1</sup> Department of Materials Science and Engineering, National Cheng Kung University, Tainan 701, Taiwan; yuyang840228@gmail.com (Y.-Y.C.); young263263@gmail.com (S.-M.Y.)

<sup>2</sup> Center for Micro/Nano Science and Technology, National Cheng Kung University, Tainan 701, Taiwan

\* Correspondence: gkclu@mail.ncku.edu.tw; Tel: +886-6-275-7575#62920

### List of contents

Figure S1 | SEM images of indium oxide nanowires grown at different conditions.

Figure S2 | EDS analysis of the indium oxide nanowire

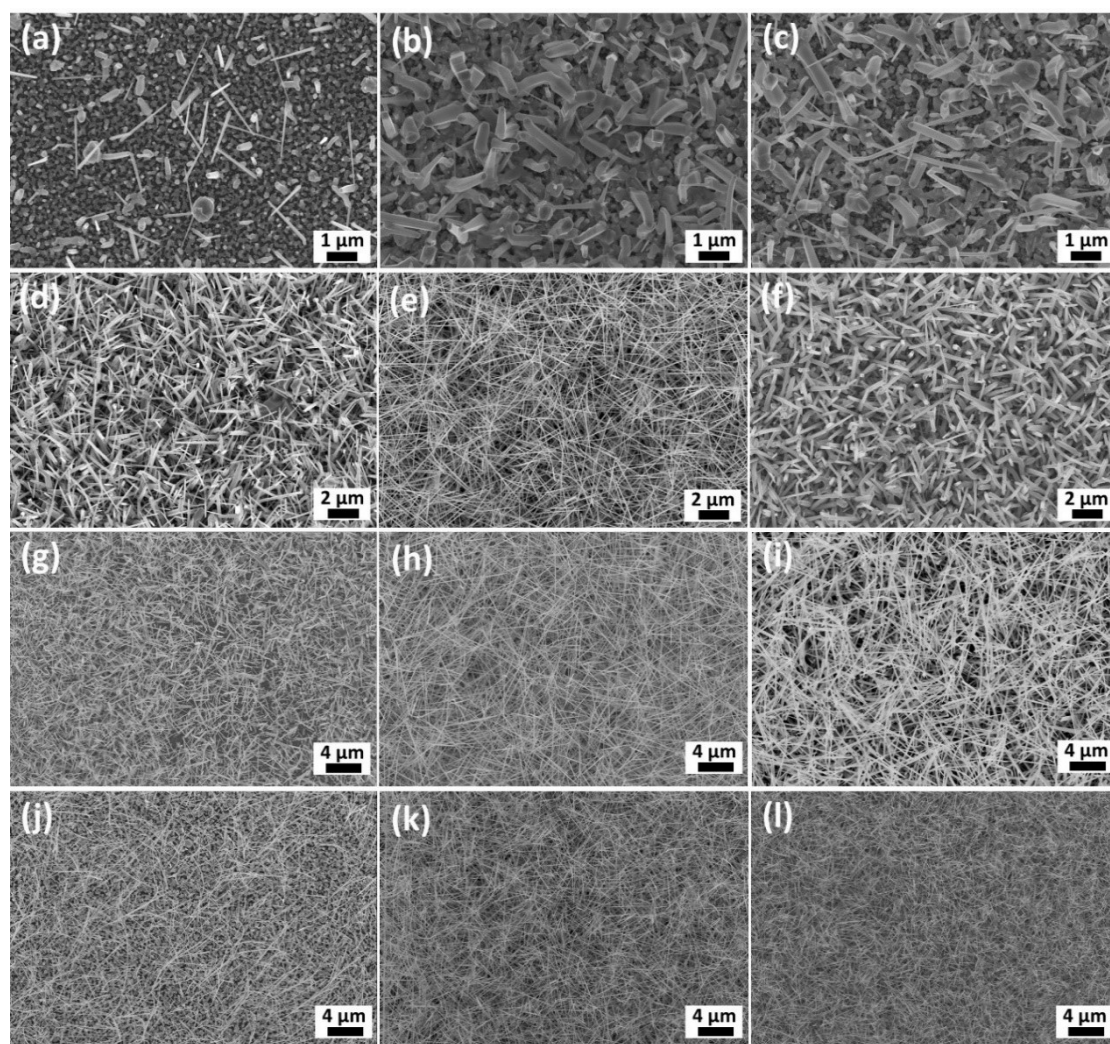

**Figure S1.** SEM images of indium oxide nanowires grown at different growth conditions.

Figure S1 shows SEM images of the nanowires grown at different growth conditions. Figure S1 (a-c) show the nanowires grown at different temperatures for 20 minutes. The reaction temperature for Figure S1 (a-c) was 860 °C, 860 °C, 880 °C and the deposition temperature was 540 °C, 580 °C, 540 °C, respectively. Figure S1 (d-f) show the nanowires grown at 4, 6, 8 torr for 45 minutes. Figure S1 (g-i) show the nanowires grown with reaction duration of 30, 45, 60 minutes. Figure S1 (j-l) show the nanowires grown with different indium oxide weight of 0.1, 0.15, 0.2 g for 45 minutes.

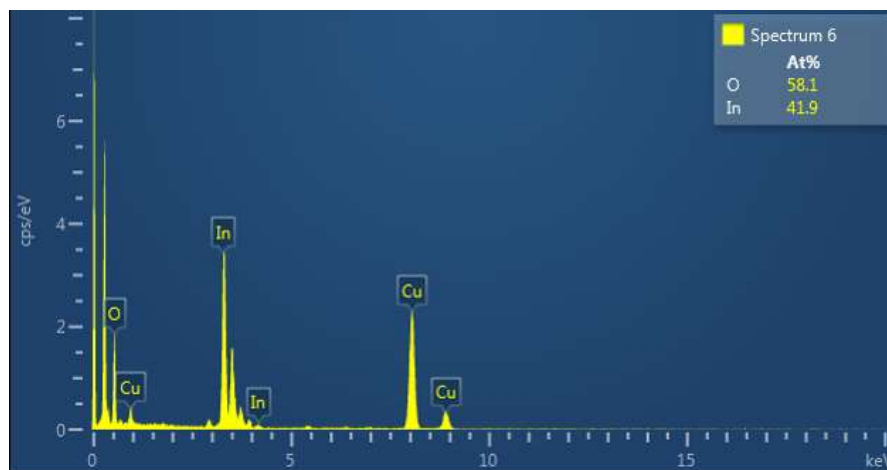

**Figure S2. EDS analysis of the indium oxide nanowire.**

Figure S2 is the EDS analysis for the  $\text{In}_2\text{O}_3$  nanowire, indicating that the atomic ratio of O/In is 1.39; the deviation may be attributed to the presence of oxygen vacancies.
